# Supplementary material
Source: PubMed Central journal article supplement (PMC3883512)
Supplement: NIHMS344654-supplement-02.pdf [file NIHMS344654-supplement-02.pdf]

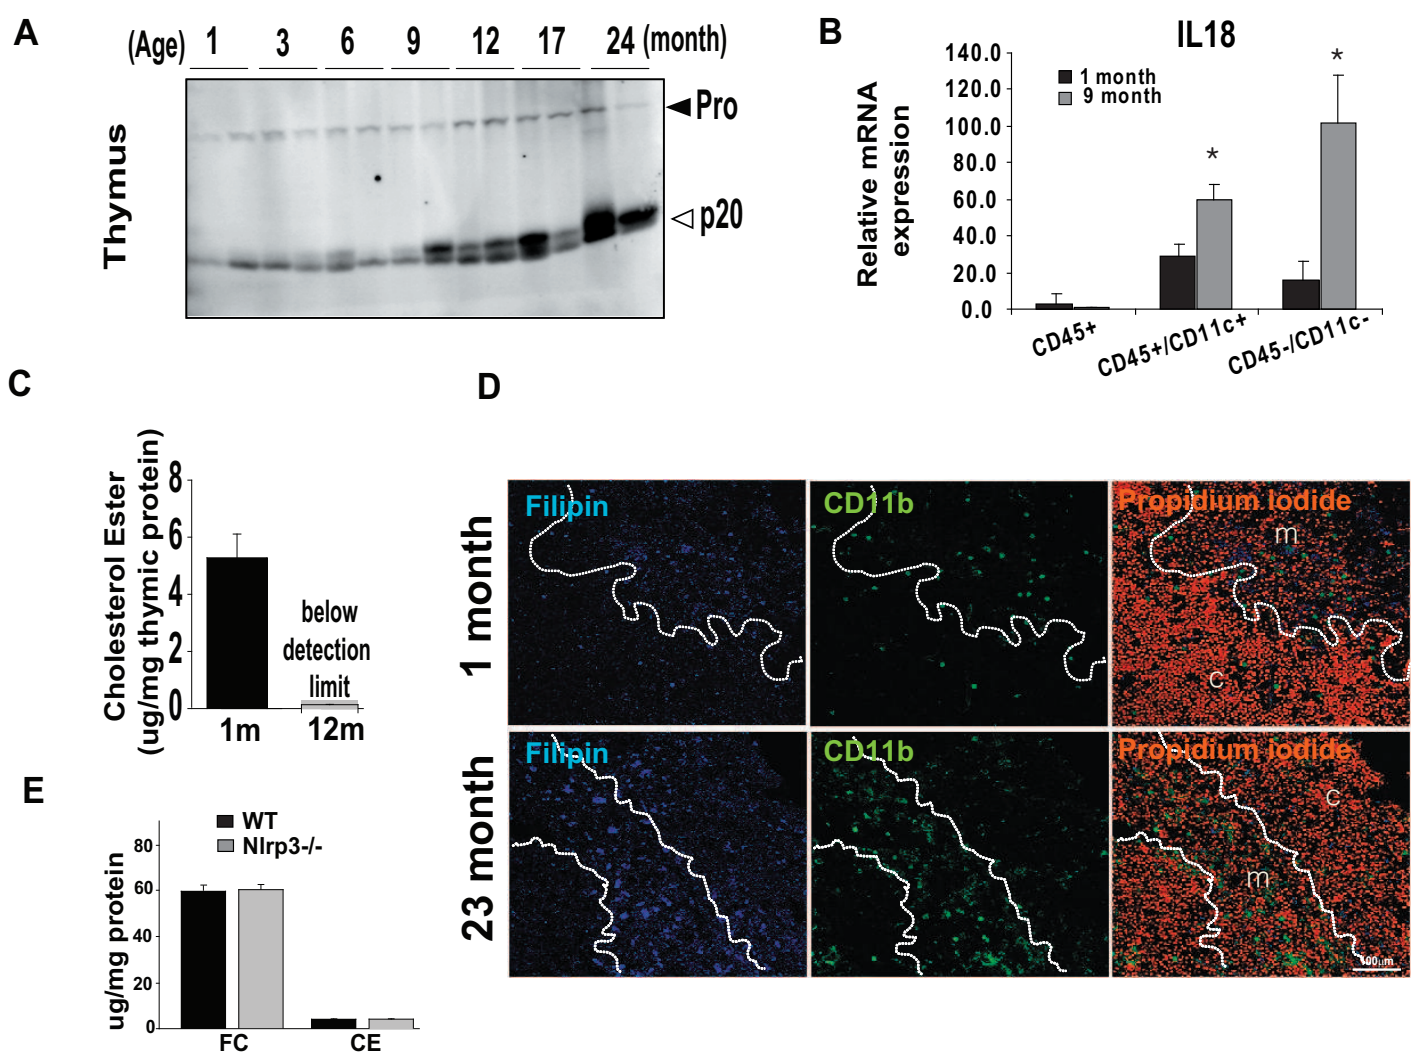

Youn et al, Supplementary Figure 1

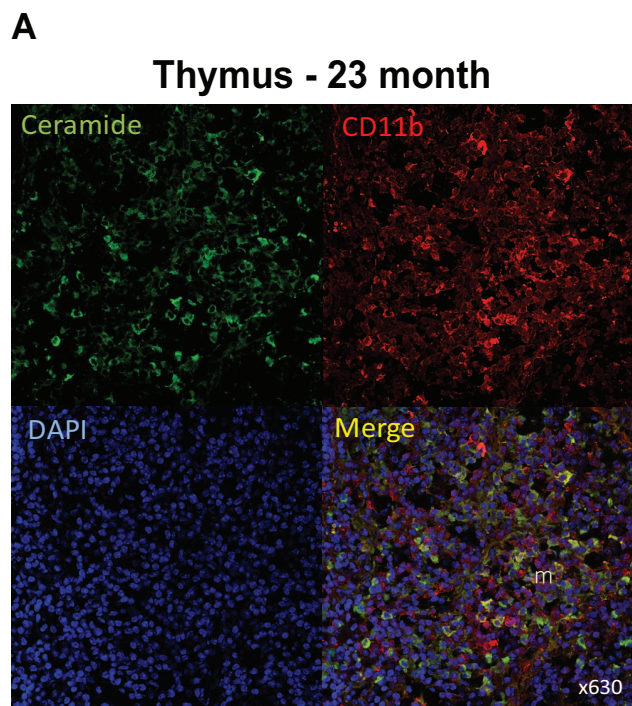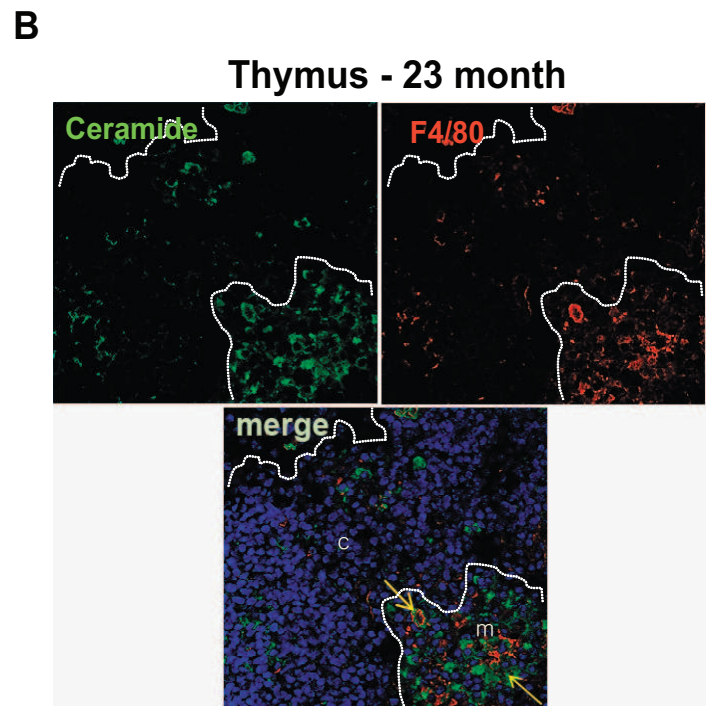

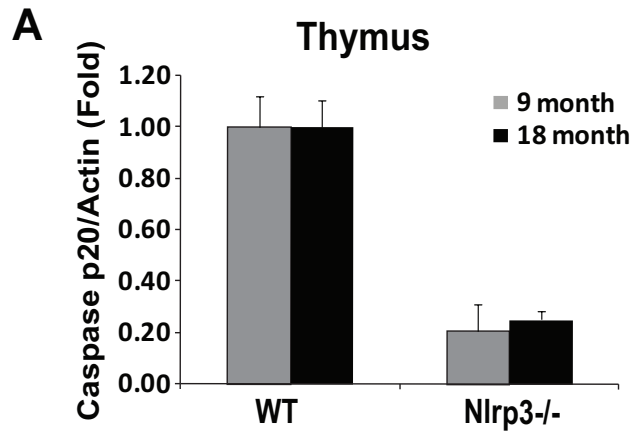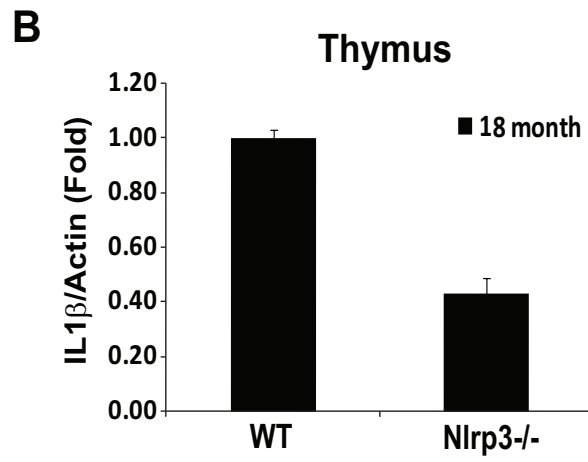

*Youm et al, Supplementary Figure 3*

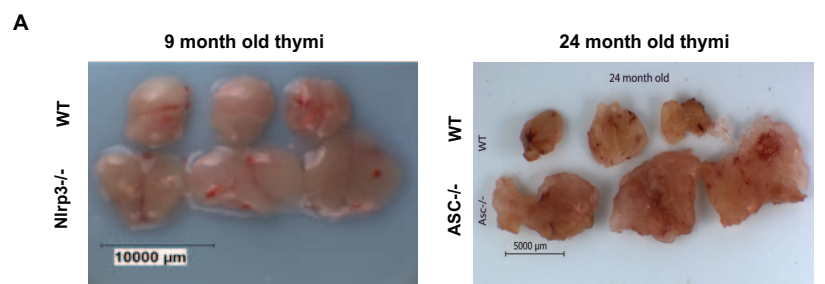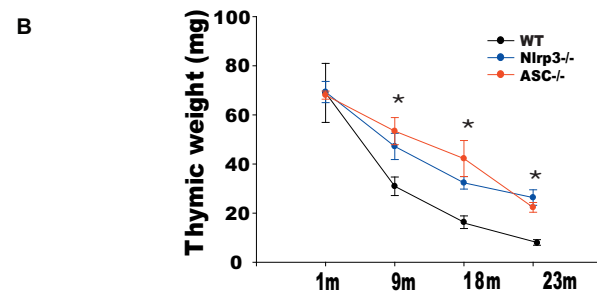

Supplementary Figure 4

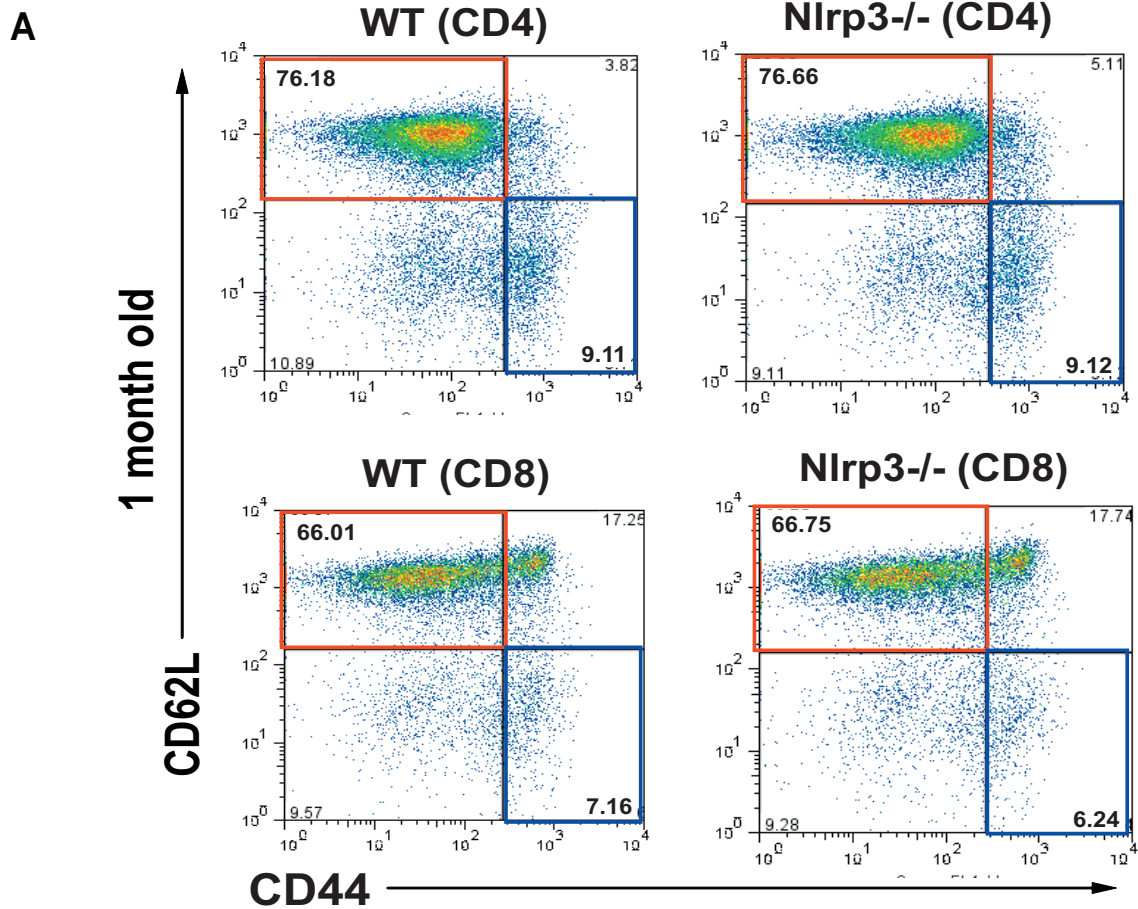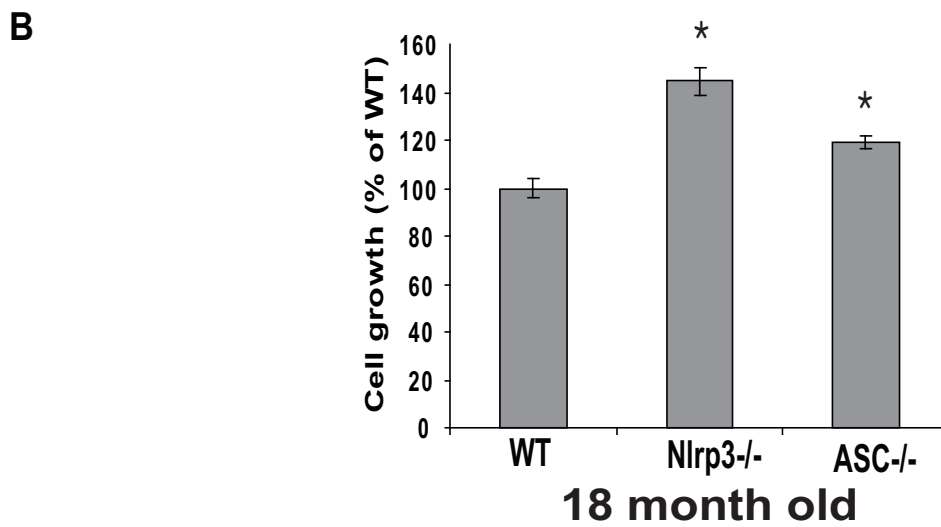

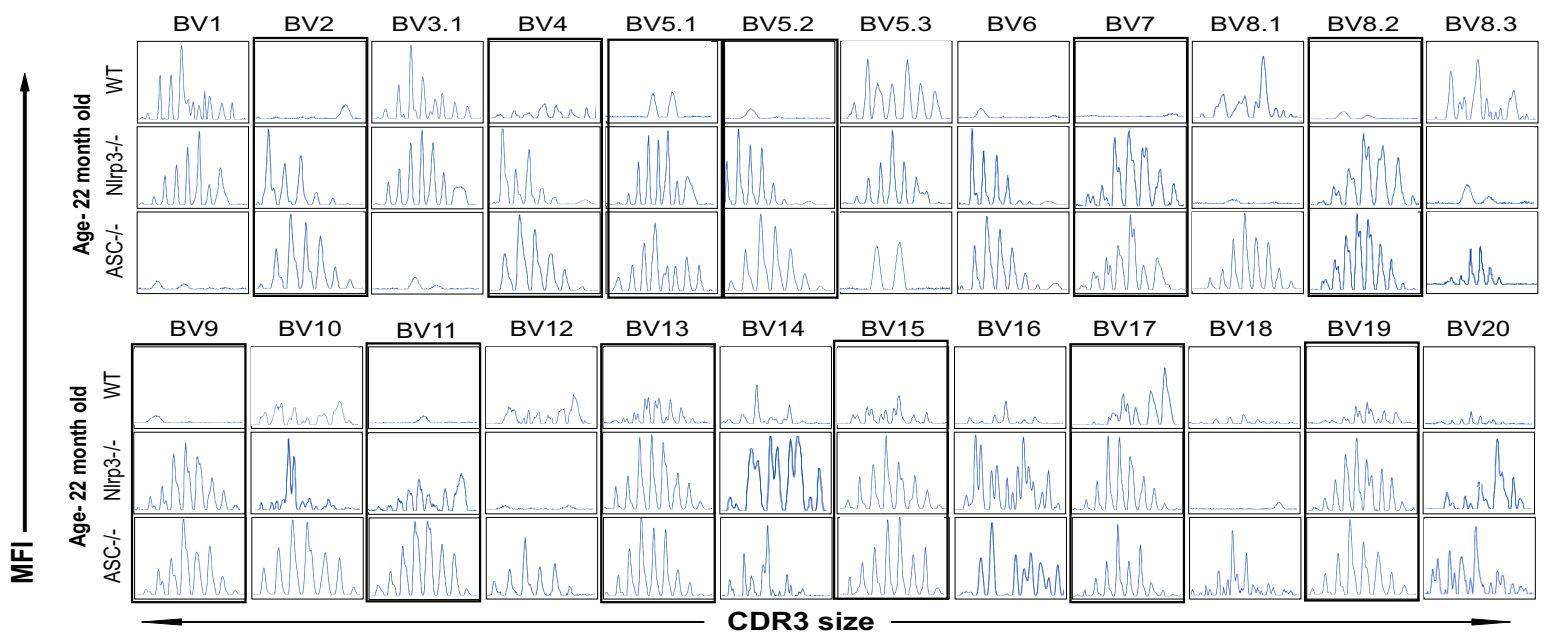



**A**

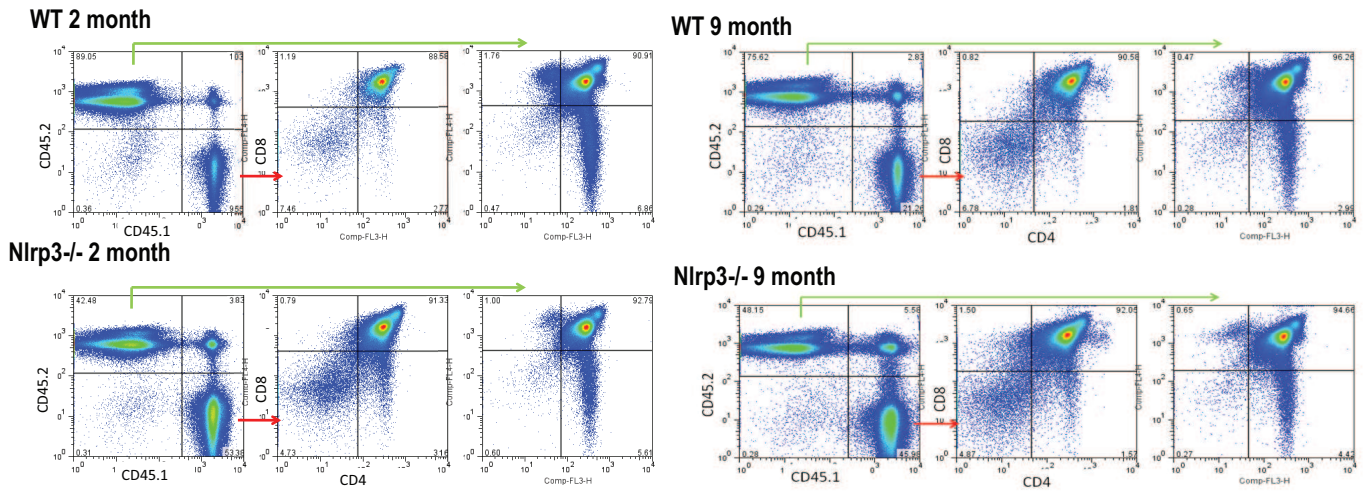

**B**

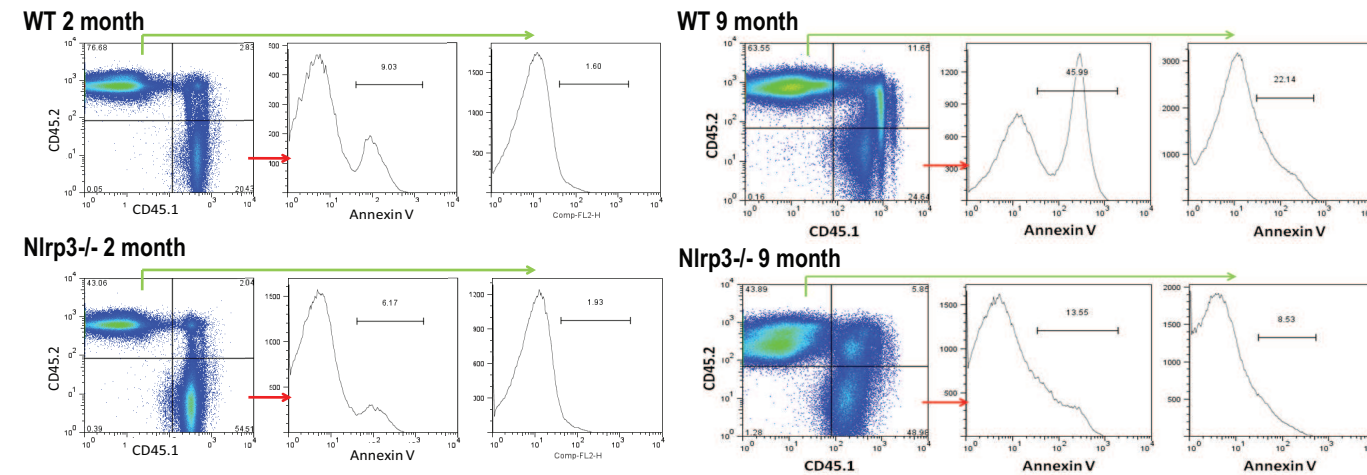

Youn et al, Supplementary Figure 7
